# Supplementary material for: Tick extracellular vesicles alter keratinocyte function in the skin epidermis
Source: PubMed Central journal article supplement — bioRxiv. 2025 Jun 10:2023.11.10.566612. Originally published 2023 Nov 10. Preprint. [Version 3] doi: 10.1101/2023.11.10.566612 (PMC10659423; doi:10.1101/2023.11.10.566612), 2025-06-10

906  
907  
908  
909  
910  
911  
912  
913  
914  
915  
916  
917  
918  
919  
920  
921  
922  
923  
924  
925  
926  
927  
928  
929  
930  
931  
932  
933  
934  
935  
936  
937  
938  
939  
940  
941  
942  
943  
944  
945  
946  
947  
948  
949  
950

**Supplementary Information for:**

**Tick extracellular vesicles impair epidermal homeostasis through immune-epithelial networks during hematophagy**

Liron Marnin<sup>1</sup>, Haikel N. Bogale<sup>2†</sup>, Hanna J. Laukaitis-Yousey<sup>1</sup>, Luisa M. Valencia<sup>1</sup>, Agustin Rolandelli<sup>1</sup>, Anya J. O’Neal<sup>1‡</sup>, Camila Rodrigues Ferraz<sup>1</sup>, Axel D. Schmitter-Sánchez<sup>3,4,5</sup>, Emily Bencosme Cuevas<sup>6</sup>, Thu-Thuy Nguyen<sup>6</sup>, Brenda Leal-Galvan<sup>7</sup>, David M. Rickert<sup>1</sup>, Vincent M. Bruno<sup>1,2</sup>, M. Tays Mendes<sup>1§#</sup>, Sourabh Samaddar<sup>1</sup>, L. Rainer Butler<sup>1</sup>, Nisha Singh<sup>1</sup>, Francly E. Cabrera Paz<sup>1</sup>, Jonathan D. Oliver<sup>8</sup>, Julie M Jameson<sup>9</sup>, Ulrike G. Munderloh<sup>10</sup>, Adela S. Oliva Chávez<sup>7</sup>, Albert Mulenga<sup>6</sup>, Sangbum Park<sup>3,4,5</sup>, David Serre<sup>1,2</sup>, and Joao H.F. Pedra<sup>1\*</sup>.

**Affiliations:**

- <sup>1</sup>Department of Microbiology and Immunology, University of Maryland School of Medicine, Baltimore, MD, USA.
- <sup>2</sup>Institute for Genome Sciences, University of Maryland School of Medicine, Baltimore, MD, USA.
- <sup>3</sup>Division of Dermatology, Department of Medicine, College of Human Medicine, Michigan State University, East Lansing, MI, USA.
- <sup>4</sup>Department of Pharmacology and Toxicology, College of Human Medicine, Michigan State University, East Lansing, MI, USA.
- <sup>5</sup>Institute for Quantitative Health Science & Engineering, Michigan State University, East Lansing, MI, USA.
- <sup>6</sup>Department of Veterinary Pathobiology, School of Veterinary Medicine and Biomedical Sciences, Texas A&M University, College Station, TX, USA.
- <sup>7</sup>Department of Entomology, Texas A&M University, College Station, TX, USA.
- <sup>8</sup>Division of Environmental Health Sciences, School of Public Health, University of Minnesota, Minneapolis, MN, USA.
- <sup>9</sup>Department of Biology, California State University San Marcos, San Marcos, CA, USA.
- <sup>10</sup>Department of Entomology, University of Minnesota, Minneapolis, MN, USA.
- <sup>†</sup>Present address: Rancho BioSciences, San Diego, CA, USA.
- <sup>‡</sup>Present address: Immunology Program, Memorial Sloan Kettering Cancer Center, New York, NY, USA.
- <sup>§</sup>Present address: Ribeirão Preto Medical School, University of São Paulo, Ribeirão Preto, SP, Brazil.
- <sup>#</sup>Present address: Fiocruz-Bi-Institutional Translational Medicine Project, Ribeirão Preto Medical School, University of São Paulo, Ribeirão Preto, SP, Brazil.

\*Corresponding author: [jpedra@som.umaryland.edu](mailto:jpedra@som.umaryland.edu)

**This file includes:**

- Supplementary Figures and Legends (S1 to S7)  
Supplementary Tables (S1 to S3)  
Supplementary Datasets (S1 to S11)

951 **Supplementary Figure Legends**

952 **Supplementary Figure 1: DETC flow cytometry gating strategy.** 5 mm skin punch biopsies  
953 were obtained from the bite of ticks and compared to the naïve skin followed by flow cytometry  
954 analysis. Representative flow cytometry plots were gated for **(A)** DETCs (Vy5<sup>+</sup>) and **(B)** DETC  
955 co-receptors (JAML<sup>+</sup>, NKG2D<sup>+</sup>, CD25<sup>+</sup>, CD69<sup>+</sup>, CD100<sup>+</sup> or CD44<sup>+</sup>).

956  
957 **Supplementary Figure 2: ScRNAseq data filtration.** Composite datasets of FVB-Jax and  
958 FVB-Tac samples included 20,640 cells **(A)** before filtration by scran (R package). **(B)** tSNE plot  
959 of fixed threshold filtration, set to 2500-60,000 UMIs. **(C)** Doublet finder (R package) of dataset.  
960 tSNE was colored by the doublet score. **(D)** tSNE plot after fixed threshold filtration and doublet  
961 finder analysis.

962  
963 **Supplementary Figure 3: Expression of keratinocyte-specific markers.** **(A)** Graphical  
964 illustration of keratinocyte stratified layers with select marker genes. tSNE of keratinocyte  
965 clusters depicting gene expression of **(B)** *Krt14*, **(C)** *Krt5*, **(D)** *Krt1*, **(E)** *Krt10* and **(F)** *Ivl*.

966  
967 **Supplementary Figure 4: Expression of hair follicle-specific markers.** **(A)** Graphical  
968 illustration of hair follicle microanatomy with select marker genes. tSNE of keratinocyte clusters  
969 depicting gene expression of **(B)** *Shh*, **(C)** *Krt75*, **(D)** *Lgr5*, **(E)** *Mgst1* and **(F)** *Krt79*.

970  
971 **Supplementary Figure 5: Epidermally-enriched tSNE plots.** **(A-F)** Individual tSNE plots of  
972 keratinocyte, T cell and antigen presenting cell clusters in **(A)** FVB-Jax=1174 cells, **(B)** FVB-Jax  
973 scV33=651 cells, **(C)** FVB-Jax siV33=545 cells, **(D)** FVB-Tac=836 cells, **(E)** FVB-Tac  
974 scV33=1139 cells and **(F)** FVB-Tac siV33=828 cells.

975

976 **Supplementary Figure 6: Keratinocyte-specific markers along pseudotime trajectory. (A)**  
977 *Krt14*, **(B) *Krt1***, and **(C) *Ivl*** gene expression along pseudotime values (x axis) for naïve, scV33-,  
978 or siV33-tick bites on FVB-Jax or FVB-Tac mice. Cells colored by clusters from keratinocyte  
979 tSNE plot (as shown in Figure **4H**) ordered across the pseudotime (x-axis).

980

981 **Supplementary Figure 7: Flow cytometry gating strategy in keratinocyte.** 5 mm punch  
982 biopsies were obtained from the bite site of ticks or naïve skin and processed for flow cytometry.  
983 Representative flow cytometry plots were gated for **(A) EpCAM<sup>+</sup>** keratinocytes, **(B) Ki67<sup>+</sup>**, **(C)**  
984 **Anti-rabbit IgG<sup>+</sup>** for PI3K and **(D) p-PI3K<sup>+</sup>** keratinocytes.

**Supplementary Table 1: Primers and siRNA sequences**

| Target                                 | Type      | Location Within mRNA | SiRNA/Primer Name | Strand               | Primer Sequence                |
|----------------------------------------|-----------|----------------------|-------------------|----------------------|--------------------------------|
| <i>I. scapularis</i><br><i>Vamp33</i>  | siRNA     | Start at 300         | Vamp33SiF         | Forward              | AAGGACACAGTGTGGAGAGATCCTGTCTC  |
|                                        |           |                      | Vamp33SiR         | Reverse              | AAATCTCTCCACACTGTGTCCCCTGTCTC  |
|                                        | Scrambled |                      | Vamp33ScF         | Forward              | AAGTGAGGGACGCATAGTAGACCTGTCTC  |
|                                        |           |                      | Vamp33ScR         | Reverse              | AATCTACTATGCGTCCCTCACCCCTGTCTC |
|                                        | qRT-PCR   | Start at 76          | Vamp33qR-F        | Forward              | TCATACCTGAAGTTGTCCAA           |
|                                        |           | Start at 180         | Vamp33qR-R        | Reverse              | CTCAAGAATGCCACTGTTG            |
| <i>D. variabilis</i><br><i>Vamp33</i>  | siRNA     | Start at 280         | Vamp33Derm-SiF    | Forward              | AACCGGATGGTGATGTTAATCCCTGTCTC  |
|                                        |           |                      | Vamp33Derm-SiR    | Reverse              | AAGATTAACATCACCATCCGGCCTGTCTC  |
|                                        | Scrambled |                      | Vamp33Derm-ScF    | Forward              | AAGCCTCAGGTGGAATTAGTTCCTGTCTC  |
|                                        |           |                      | Vamp33Derm-ScR    | Reverse              | AAAATAATTCCACCTGAGGCCCTGTCTC   |
|                                        | qRT-PCR   | Start at 78          | Vamp33DqR-2F      | Forward              | TCACCTAAAGTTGTCCAACCC          |
|                                        |           | Start at 160         | Vamp33DqR-2R      | Reverse              | TCAAGGATTCCACTGTTGGG           |
|                                        | qRT-PCR   | Start at 64          | Vamp33DqR-F       | Forward              | GACGTGGTTACTTCTCACCTAAA        |
| Start at 148                           |           | Vamp33DqR-R          | Reverse           | CTGTTGGGCCGTACACAATA |                                |
| <i>A. americanum</i><br><i>Vamp33</i>  | siRNA     | Start at 280         | Vamp33AA-SiF      | Forward              | AACCAGATGGTGATGTGAACCCCTGTCTC  |
|                                        |           |                      | Vamp33AA-SiR      | Reverse              | AAGGTTACATCACCATCTGGCCTGTCTC   |
|                                        | Scrambled |                      | Vamp33AA-ScF      | Forward              | AAGGGTGCTAACACGGACTTACCTGTCTC  |
|                                        |           |                      | Vamp33AA-ScR      | Reverse              | AATAAGTCCGTGTTAGCACCCCTGTCTC   |
|                                        | qRT-PCR   | Start at 76          | Vamp33AA qR-F     | Forward              | TCTCATCTAAAGCTTTCCAACCC        |
|                                        |           | Start at 160         | Vamp33AA qR-R     | Reverse              | AAGGATGCCACTGTTGGG             |
| <i>I. scapularis</i><br>$\beta$ -actin | qRT-PCR   | Start at 618         | ActinIS 2F        | Forward              | GGTCATCACAATCGGCAAC            |
|                                        |           | Start at 742         | ActinIS 2R        | Reverse              | ATGGAGTTGTACGTGGTCTC           |
| <i>A. americanum</i><br>$\beta$ -actin | qRT-PCR   | Start at 285         | ActinAA F         | Forward              | GTCATGGTCGGCATGGG              |
|                                        |           | Start at 365         | ActinAA R         | Reverse              | ATGCCGTGCTCAATGGG              |
| <i>D. variabilis</i><br>$\beta$ -actin | qRT-PCR   | Start at 798         | ActinIS 2F        | Forward              | GGTCATCACAATCGGCAAC            |
|                                        |           | Start at 905         | ActinIS 2R        | Reverse              | ATGGAGTTGTACGTGGTCTC           |

**Supplementary Table 2: Cell markers**

| Cell type                                         | Cell population      | Gene                                 | Ensembl            |
|---------------------------------------------------|----------------------|--------------------------------------|--------------------|
| Antigen presenting cells                          | All                  | <i>H2-Aa</i>                         | ENSMUSG00000036594 |
|                                                   |                      | <i>H2-Ab1</i>                        | ENSMUSG00000073421 |
|                                                   | Langerhans           | <i>Cd207</i>                         | ENSMUSG00000034783 |
|                                                   | Dendritic cells      | <i>Itgax</i>                         | ENSMUSG00000030789 |
|                                                   |                      | <i>Cd80</i>                          | ENSMUSG00000075122 |
|                                                   |                      | <i>Cd86</i>                          | ENSMUSG00000022901 |
|                                                   |                      | <i>Ly75</i>                          | ENSMUSG00000026980 |
|                                                   | Macrophage           | <i>Cd209a</i>                        | ENSMUSG00000031494 |
|                                                   |                      | <i>Adgre1</i>                        | ENSMUSG00000004730 |
|                                                   | Keratinocytes        | Undifferentiated<br>(Stratum basale) | <i>Itgam</i>       |
| <i>Krt5</i>                                       |                      |                                      | ENSMUSG00000061527 |
| <i>Krt14</i>                                      |                      |                                      | ENSMUSG00000045545 |
| Differentiating<br>(Stratum spinosum)             |                      | <i>Krt15</i>                         | ENSMUSG00000054146 |
|                                                   |                      | <i>Krt 1</i>                         | ENSMUSG00000046834 |
|                                                   |                      | <i>Krt2</i>                          | ENSMUSG00000064201 |
| Terminally differentiated<br>(Stratum granulosum) |                      | <i>Krt10</i>                         | ENSMUSG00000019761 |
|                                                   |                      | <i>Ivl</i>                           | ENSMUSG00000049128 |
| Corneocytes<br>(Stratum corneum)                  |                      | <i>Flg</i>                           | ENSMUSG00000102439 |
| T cells                                           |                      | All                                  | <i>Klk5</i>        |
|                                                   | <i>Cd3d</i>          |                                      | ENSMUSG00000032094 |
|                                                   | <i>Cd3e</i>          |                                      | ENSMUSG00000032093 |
|                                                   | $\alpha\beta$ T cell | <i>Cd3g</i>                          | ENSMUSG00000002033 |
|                                                   |                      | <i>Trac</i>                          | ENSMUSG00000076928 |
|                                                   |                      | <i>Trbc1</i>                         | ENSMUSG00000076490 |

|                  |                     |                    |                    |
|------------------|---------------------|--------------------|--------------------|
|                  |                     | <i>Trbc2</i>       | ENSMUSG00000076498 |
|                  |                     | <i>CD4</i>         | ENSMUSG00000023274 |
|                  |                     | <i>CD8a</i>        | ENSMUSG00000053977 |
|                  | γδ T cell           | <i>Trdc</i>        | ENSMUSG00000104876 |
|                  |                     | <i>Tcrg-C1</i>     | ENSMUSG00000076749 |
|                  |                     | <i>Tcrg-C2</i>     | ENSMUSG00000076752 |
|                  |                     | <i>Tcrg-C4</i>     | ENSMUSG00000076757 |
|                  | DETCs               | <i>Trdv4</i>       | ENSMUSG00000076867 |
|                  |                     | <i>Sema4d</i>      | ENSMUSG00000021451 |
|                  |                     | <i>Jaml</i>        | ENSMUSG00000048534 |
| <i>Klrk1</i>     |                     | ENSMUSG00000030149 |                    |
| Endothelial      | <i>Cldn5</i>        | ENSMUSG00000041378 |                    |
|                  | <i>Cdh5</i>         | ENSMUSG00000031871 |                    |
|                  | <i>Egfl7</i>        | ENSMUSG00000026921 |                    |
| Fibroblasts      | <i>Dcn</i>          | ENSMUSG00000019929 |                    |
|                  | <i>Fgf2</i>         | ENSMUSG00000037225 |                    |
|                  | <i>Fgf7</i>         | ENSMUSG00000027208 |                    |
| Hair follicle    | Upper hair follicle | <i>Krt79</i>       | ENSMUSG00000061397 |
|                  |                     | <i>Krt17</i>       | ENSMUSG00000035557 |
|                  | Sebaceous gland     | <i>Mgst1</i>       | ENSMUSG00000008540 |
|                  |                     | <i>Scd1</i>        | ENSMUSG00000037071 |
|                  | Outer bulge         | <i>Postn</i>       | ENSMUSG00000027750 |
|                  |                     | <i>Lgr5</i>        | ENSMUSG00000020140 |
|                  | Inner bulge         | <i>Krt6a</i>       | ENSMUSG00000058354 |
|                  |                     | <i>Krt75</i>       | ENSMUSG00000022986 |
| Base of follicle | <i>Shh</i>          | ENSMUSG00000002633 |                    |
| Hair germ        | <i>Gli1</i>         | ENSMUSG00000025407 |                    |
| Melanocytes      |                     | <i>Dct</i>         | ENSMUSG00000022129 |

|                     |  |               |                    |
|---------------------|--|---------------|--------------------|
|                     |  | <i>Mlana</i>  | ENSMUSG00000024806 |
|                     |  | <i>Tyr</i>    | ENSMUSG00000004651 |
| Red blood cells     |  | <i>Hbb-bs</i> | ENSMUSG00000052305 |
|                     |  | <i>Hbb-bt</i> | ENSMUSG00000073940 |
| Schwann cells       |  | <i>Mal</i>    | ENSMUSG00000027375 |
|                     |  | <i>Plp1</i>   | ENSMUSG00000031425 |
|                     |  | <i>Sox10</i>  | ENSMUSG00000033006 |
| Smooth muscle cells |  | <i>Acta2</i>  | ENSMUSG00000035783 |
|                     |  | <i>Myh11</i>  | ENSMUSG00000018830 |
|                     |  | <i>Myl9</i>   | ENSMUSG00000067818 |
|                     |  | <i>Myocd</i>  | ENSMUSG00000067818 |
|                     |  | <i>Rgs5</i>   | ENSMUSG00000026678 |

988

**Supplementary Table 3:** Resources and reagents available

| Antibody                                                | Source                                                                   | Identifier | Dilution/<br>Concentration |
|---------------------------------------------------------|--------------------------------------------------------------------------|------------|----------------------------|
| 7-AAD Viability Staining Solution                       | Biolegend                                                                | 420404     | 1:500                      |
| Zombie Violet Fixable Live Dead stain                   | Biolegend                                                                | 423113     | 1:500                      |
| Anti-mouse CD16/32 Antibody                             | Biolegend                                                                | 156603     | 1:500                      |
| APC anti-mouse CD45 Antibody clone: 30-F11              | Biolegend                                                                | 103111     | 1:100                      |
| FITC anti-mouse CD3 Antibody clone:17A2                 | Biolegend                                                                | 100203     | 1:100                      |
| BV650 anti-mouse Vy3 Antibody clone: 536                | BD                                                                       | 743241     | 1:50                       |
| PE Mouse Anti-Rat IgM clone:G53-238                     | BD                                                                       | 553888     | 1:100                      |
| Monoclonal antibody 17D1                                | Adrian Hayday, Kings College London and Robert Tigelaar, Yale University | N/A        | 1:50                       |
| PE/Cyanine7 anti-mouse CD45 Antibody clone: 30-F11      | Biolegend                                                                | 103114     | 1:100                      |
| APC anti-mouse Thy1.2 Antibody clone: 30-H12            | Biolegend                                                                | 105312     | 1:100                      |
| PE anti-mouse JAML Antibody clone: 4E10                 | Biolegend                                                                | 128503     | 1:100                      |
| BV711 anti-mouse CD100 Antibody clone: BMA-12           | BD                                                                       | 745492     | 1:100                      |
| PE/Cyanine5 anti-mouse CD44 Antibody clone: IM7         | Biolegend                                                                | 103010     | 1:100                      |
| APC/Cyanine7 anti-mouse CD25 Antibody clone: PC61       | Biolegend                                                                | 102026     | 1:100                      |
| PerCP/Cyanine5.5 anti-mouse CD69 Antibody clone: H1.2F3 | Biolegend                                                                | 104522     | 1:100                      |
| APC anti-mouse CD314 (NKG2D) Antibody clone: CX5        | Biolegend                                                                | 130212     | 1:100                      |
| Alexa Fluor 700 anti-mouse Ki-67 Antibody clone: 16A8   | Biolegend                                                                | 652420     | 1:50                       |
| BV711 anti-mouse CD326 (Ep-CAM) Antibody clone: G8.8    | Biolegend                                                                | 118233     | 1:100                      |
| PE anti-mouse CD200 Antibody clone: OX-90               | Biolegend                                                                | 123807     | 1:100                      |



|                                                                                     |                         |           |       |
|-------------------------------------------------------------------------------------|-------------------------|-----------|-------|
| PE/Cyanine5 anti-mouse CD34 Antibody clone: MEC14.7                                 | Biologend               | 119312    | 1:100 |
| BV605 anti-mouse Sca1 Antibody clone: D7                                            | Biologend               | 108133    | 1:100 |
| PE anti-mouse CD49f Antibody clone: GoH3                                            | Biologend               | 313612    | 1:100 |
| FITC Phospho-PI3K p85/p55 (Tyr458, Tyr199) Monoclonal Antibody clone: PI3KY458-1A11 | ThermoFisher Scientific | MA5-36955 | 1:50  |
| PI3K p85 alpha Monoclonal Antibody clone: SU04-07                                   | ThermoFisher Scientific | MA5-41128 | 1:50  |
| Alexa Fluor 405 Goat anti-Rabbit IgG (H+L) Secondary Antibody                       | ThermoFisher Scientific | A-31556   | 1:100 |

| <b>Cell media</b>                                      |                 |             |            |
|--------------------------------------------------------|-----------------|-------------|------------|
| Leibovitz's L-15 Medium, powder                        | Gibco           | 41300039    | N/A        |
| L-aspartic acid                                        | Millipore-Sigma | 11189       | 0.449 g/L  |
| L-glutamine                                            | Millipore-Sigma | G8540       | 0.500 g/L  |
| L-proline                                              | Millipore-Sigma | 81709       | 0.450 g/L  |
| L-glutamic acid                                        | Millipore-Sigma | 49449       | 0.250 g/L  |
| alpha-ketoglutaric acid                                | Millipore-Sigma | K1128       | 0.449 g/L  |
| Sodium hydroxide                                       | Millipore-Sigma | S8045       | 10 N       |
| D-glucose                                              | Millipore-Sigma | G7021       | 18.018 g/L |
| FBS (USDA approved; for tick media)                    | Millipore-Sigma | F0926-500ML | 0.1        |
| Bacto™ Tryptose Phosphate Broth                        | BD              | 260300      | 5%         |
| Lipoprotein Concentrate                                | MP Biomedicals  | 191476      | 0.1%       |
| Corning® 100 mL Penicillin-Streptomycin Solution, 100x | Corning         | 30-002-CI   | 1:100      |
| Amphotericin B                                         | Gibco           | 15290-026   | 1:100      |
| Distilled water                                        | Gibco           | 15-230-147  | N/A        |
|                                                        |                 |             |            |
| <b>Materials</b>                                       |                 |             |            |
| Cell culture plate with lid (6 well, flat bottom)      | Sigma           | SIAL0516    | N/A        |

|                                                                             |                     |                |       |
|-----------------------------------------------------------------------------|---------------------|----------------|-------|
| Cellstart®, 96 well cell culture plate, F-bottom                            | Greiner bio-one     | 655 160        | N/A   |
| Costar® cell culture plate with lid (24 well, flat bottom)                  | Corning             | CLS3526-1EA    | N/A   |
| Nunc™ 96-Well Polystyrene Round Bottom Microwell Plates                     | Thermo Scientific   | 262162         | N/A   |
| Vannas spring scissors, 4 mm cutting edge straight                          | Fine Science        | 15018-10       | N/A   |
| Integra Miltex 2 mm biopsy punches                                          | Integra             | 95039-098      | N/A   |
| Integra Miltex 5 mm biopsy punches                                          | Integra             | 33-35          | N/A   |
| AcuPunch biopsy punches 10 mm                                               | Acuderm             | P1050          | N/A   |
| FALCON® 14 ml Polypropylene round-bottom tube                               | Corning             | 352059         | N/A   |
| Corning® cell strainer size 40 µm, blue, sterile                            | Corning             | 431750         | N/A   |
| Falcon 5 mL Round Bottom Polystyrene Test Tube, with Cell Strainer Snap Cap | Corning             | 352235         | N/A   |
| 12x75mm Plastic Tubes                                                       | Globe Scientific    | 110441         | N/A   |
| 1.5 mL Eppendorf Safe-Lock Tubes                                            | USA Scientific      | 1615-5500      | N/A   |
| 1.5ml Microcentrifuge Tubes with Socket Screw Caps                          | VWR                 | 525-1238       | N/A   |
| Lo-bind tubes                                                               | Eppendorf           | 22431048       | N/A   |
| Vannas Spring Scissors - 4mm                                                | Fine Science Tools  | 15018-10       | N/A   |
|                                                                             |                     |                |       |
| <b>Reagents</b>                                                             |                     |                |       |
| Trypsin/Lys-C Mix, Mass Spec Grade                                          | Promega             | V5071          | N/A   |
| Bovine Serum Albumin                                                        | Millipore-Sigma     | A2058-5G       | N/A   |
| BenchMark™ FBS                                                              | Gemini Bio-products | 100-106        | 1:10  |
| Methanol anhydrous, 99.8%                                                   | Millipore-Sigma     | 322415-1L      | 0-20% |
| Ethyl alcohol, Pure; 200 proof for molecular biology                        | Millipore-Sigma     | E7023-1L       | 1:1   |
| TRIzol reagent                                                              | Ambion              | 15596018       | N/A   |
| Liberase™ TL Research Grade                                                 | Roche               | 540102000<br>1 | 10%   |
| RPMI-1640 with L-Glutamine                                                  | Quality Biological  | 722461         | N/A   |

|                                                     |                          |                 |                    |
|-----------------------------------------------------|--------------------------|-----------------|--------------------|
| DNase I                                             | Roche                    | 112849320<br>01 | N/A                |
| 10X Phosphate-buffered saline (PBS)                 | Quality Biological       | 119-069-<br>131 | 1X                 |
| Phosphate-buffered saline (PBS)                     | Gibco                    | 10010-023       | N/A                |
| 0.5M Ethylenediaminetetraacetic acid (EDTA), pH 8.0 | Boston BioProducts       | BM-150          | N/A                |
| Sodium azide (NaN <sub>3</sub> )                    | Sigma-Aldrich            | S2002-25G       | N/A                |
| Paraformaldehyde                                    | Thermo Fisher Scientific | J61899-AP       | N/A                |
| RIPA lysis buffer                                   | Millipore                | 20-188          | 1X                 |
| Halt Protease Inhibitor Cocktail                    | Thermo Fisher Scientific | 87786           | 1X                 |
| Halt™ Phosphatase Inhibitor Cocktail                | Thermo Fisher Scientific | 78420           | 1X                 |
| Dispase II                                          | Sigma-Aldrich            | D4693-1G        | NA                 |
| Dispase                                             | Gibco                    | 17105-041       | 4 U/mL             |
| Magnesium chloride (MgCl <sub>2</sub> )             | Sigma-Aldrich            | M2393-<br>100G  | 5mM                |
| Calcium chloride (CaCl <sub>2</sub> )               | Sigma-Aldrich            | C1016-<br>100G  | 0.4mM              |
| Collagenase D                                       | Sigma-Aldrich            | 110888660<br>01 | 2.5mg/mL           |
| Gum rosin                                           | Millipore-Sigma          | 60895           | 75% (3/4<br>parts) |
| Beeswax                                             | Thermo Fisher Scientific | S25192A         | 25% (1/4<br>parts) |
|                                                     |                          |                 |                    |
| <b>Commercial Assays</b>                            |                          |                 |                    |
| Pure Link RNA mini kit                              | Ambion                   | 12183025        | N/A                |
| Silencer™ siRNA Construction Kit                    | Thermo Scientific        | AM1620          | N/A                |
| Verso cDNA Synthesis Kit                            | Thermo Scientific        | AB-1453B        | N/A                |
| Pierce BCA Protein Assay Kit                        | Thermo Scientific        | 23227           | N/A                |
| DNeasy® Blood and Tissue kit                        | Qiagen                   | 69506           | N/A                |
| FOXP3 Fix/Perm Buffer Set                           | BioLegend                | 421403          | N/A                |

|                                                           |                                                                                                                                                                 |           |     |
|-----------------------------------------------------------|-----------------------------------------------------------------------------------------------------------------------------------------------------------------|-----------|-----|
| Human KGF/FGF-7 Quantikine ELISA Kit                      | R&D Systems                                                                                                                                                     | DKG00     | NA  |
| <b>Organisms</b>                                          |                                                                                                                                                                 |           |     |
| <i>Ixodes scapularis</i> adult partially fed female ticks | Albert Mulenga, Texas A&M University                                                                                                                            | N/A       | N/A |
| <i>Ixodes scapularis</i> adult partially fed female ticks | Adela Oliva Chavez, Texas A&M University                                                                                                                        | N/A       | N/A |
| <i>Ixodes scapularis</i> nymph ticks                      | Jon Oliver and Ulrike Munderloh, University of Minnesota                                                                                                        | N/A       | N/A |
| <i>Ixodes scapularis</i> nymph ticks                      | Tick Lab, Oklahoma State University                                                                                                                             | N/A       | N/A |
| <i>Amblyomma americanum</i> nymph ticks                   | Tick Lab, Oklahoma State University                                                                                                                             | N/A       | N/A |
| <i>Dermacentor variabilis</i> nymph ticks                 | Tick Lab, Oklahoma State University                                                                                                                             | N/A       | N/A |
| C57BL6J (WT) mice                                         | University of Maryland                                                                                                                                          | N/A       | N/A |
| C57BL6J (WT) mice                                         | Jackson Laboratories                                                                                                                                            | #000664   | N/A |
| FVB/NJ mice                                               | The Jackson Laboratory                                                                                                                                          | 001800    | N/A |
| FVB/NTac mice                                             | Taconic Biosciences                                                                                                                                             | N/A       | N/A |
| <b>Equipment</b>                                          |                                                                                                                                                                 |           |     |
| CFX96 Touch Real-Time PCR Detection System                | Biorad                                                                                                                                                          | N/A       | N/A |
| Nanoject III                                              | Drummond Scientific Company                                                                                                                                     | 3-000-207 | N/A |
| NanoSight NS300                                           | Malvern Panalytical                                                                                                                                             | N/A       | N/A |
| Percival I30BLL incubator                                 | Percival                                                                                                                                                        | I30BLL    | N/A |
| <b>Software</b>                                           |                                                                                                                                                                 |           |     |
| GraphPad Prism v9.1.2                                     | <a href="https://www.graphpad.com/">https://www.graphpad.com/</a>                                                                                               | N/A       | N/A |
| Graphpad Quick Cals Outlier Calculator                    | <a href="https://www.graphpad.com/quickcalcs/Grubbs1.cfm">https://www.graphpad.com/quickcalcs/Grubbs1.cfm</a>                                                   | N/A       | N/A |
| FlowJo (v10.6.1 – 10.8.1)                                 | <a href="https://www.flowjo.com/">https://www.flowjo.com/</a>                                                                                                   | N/A       | N/A |
| QIAGEN Ingenuity Pathway Analysis                         | <a href="https://digitalinsights.qiagen.com/products-overview/discovery-insights-">https://digitalinsights.qiagen.com/products-overview/discovery-insights-</a> | N/A       | N/A |

|                                                                                        |                                                                     |     |     |
|----------------------------------------------------------------------------------------|---------------------------------------------------------------------|-----|-----|
|                                                                                        | portfolio/analysis-and-visualization/qiagen-ipa/                    |     |     |
| Database for Annotation, Visualization and Integrated Discovery (DAVID) (version 2021) | <a href="https://david.ncifcrf.gov/">https://david.ncifcrf.gov/</a> | N/A | N/A |

990

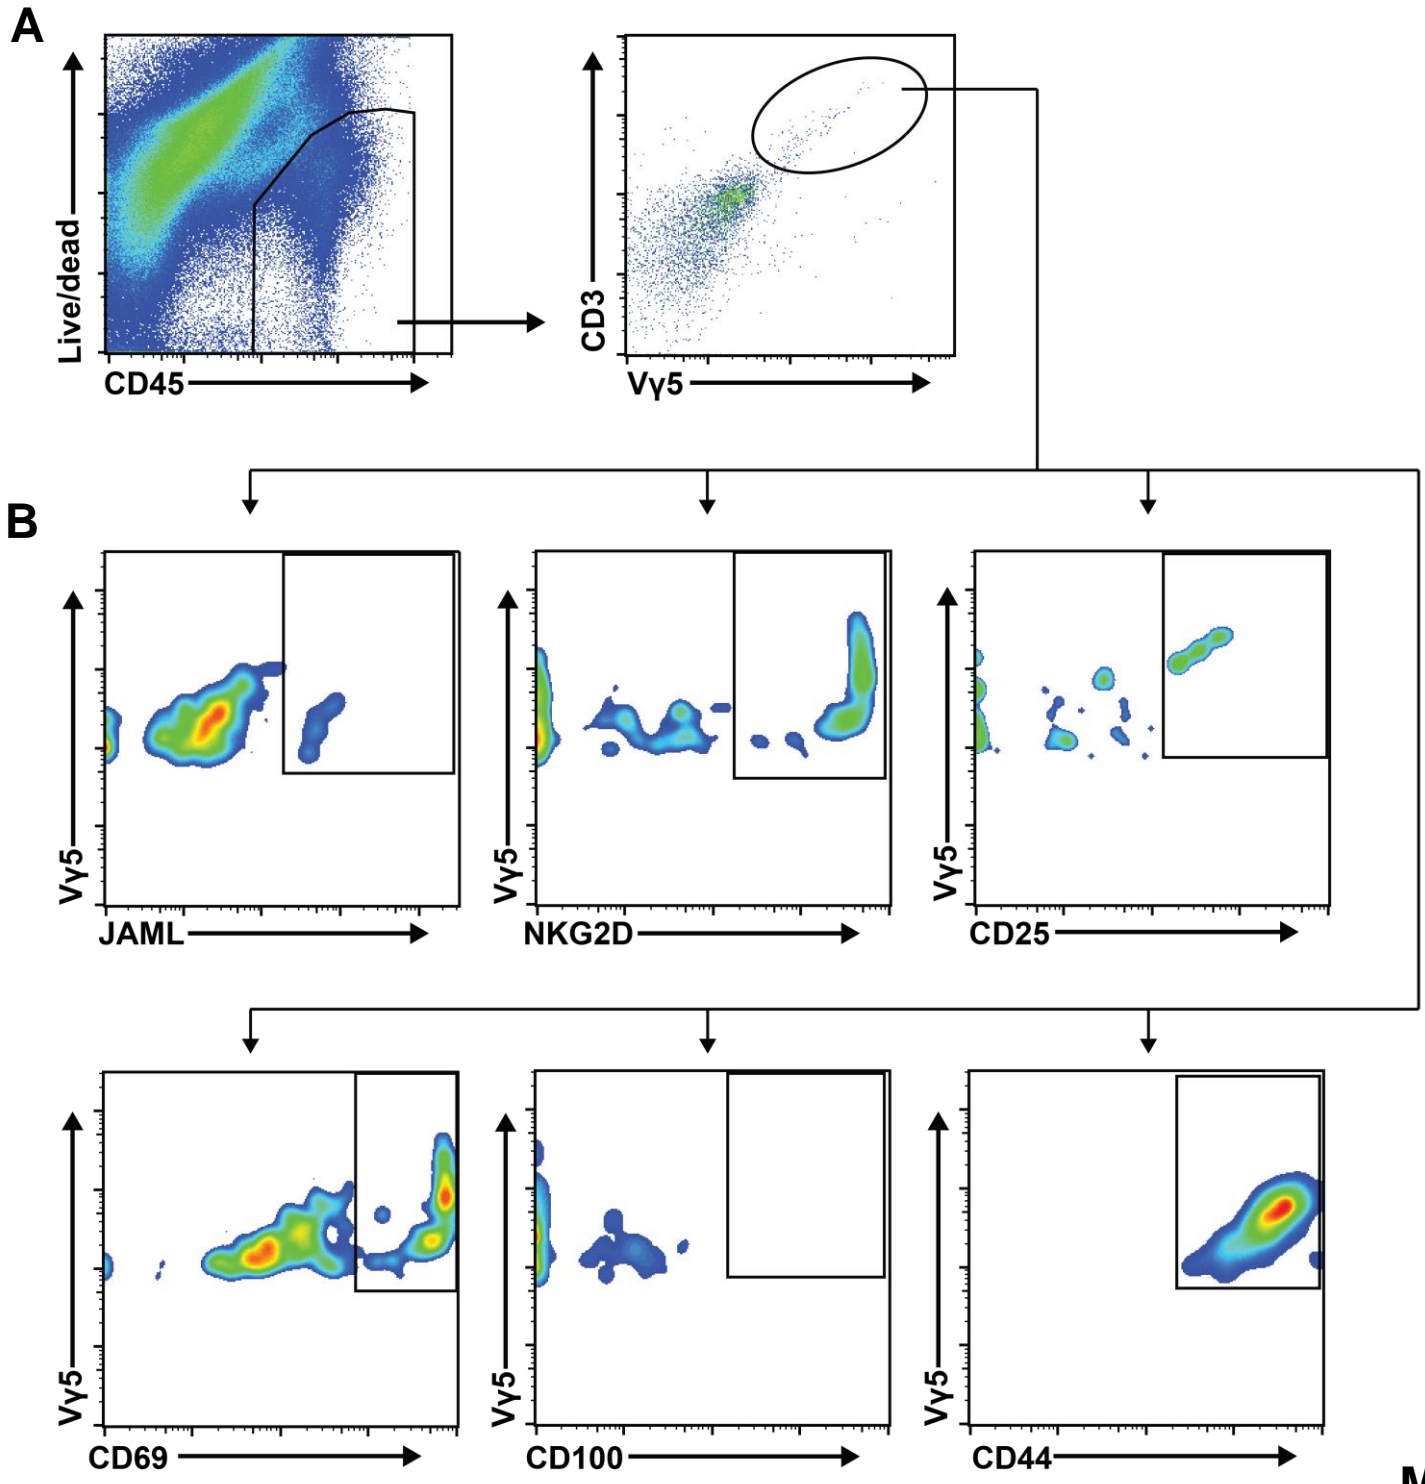

Marnin *et al.* – Supp. Figure 1

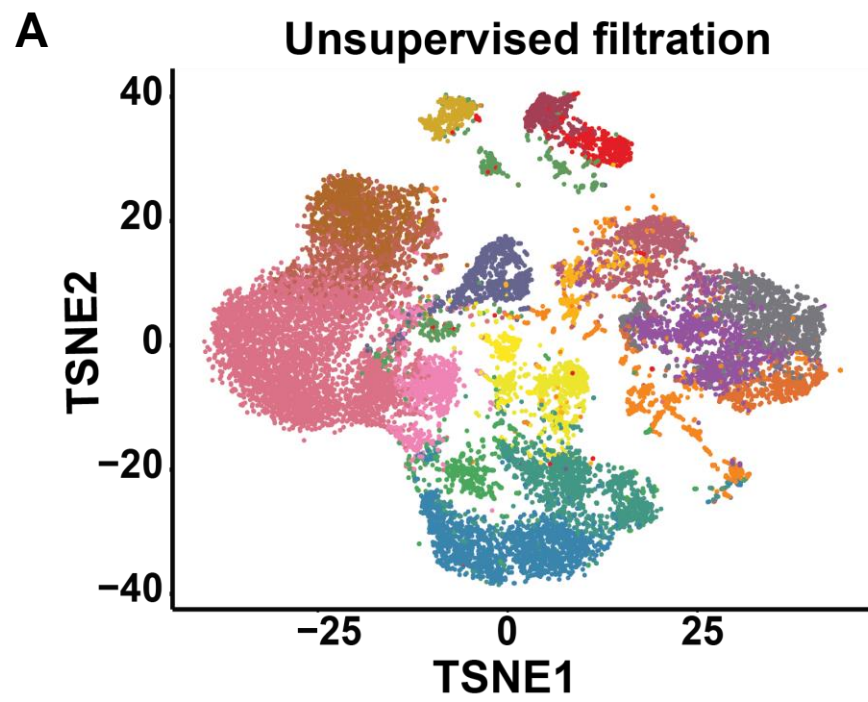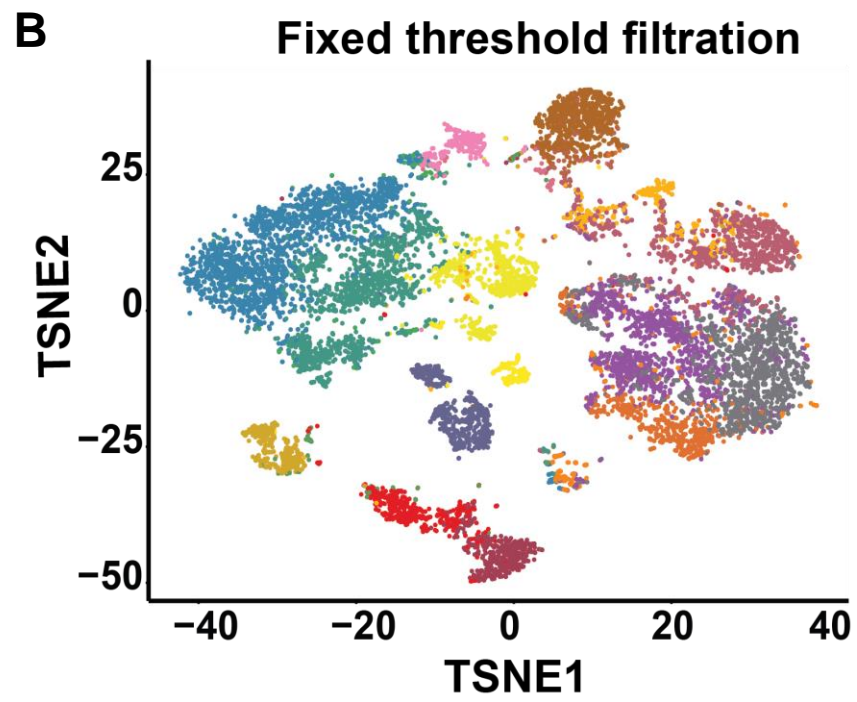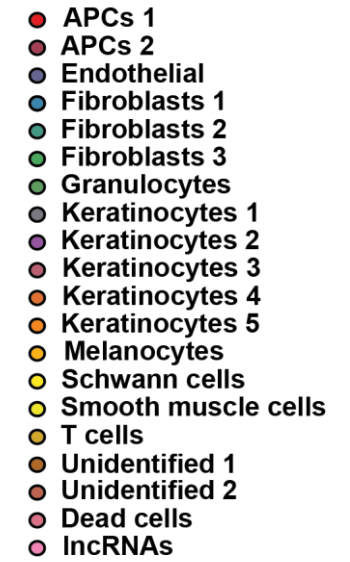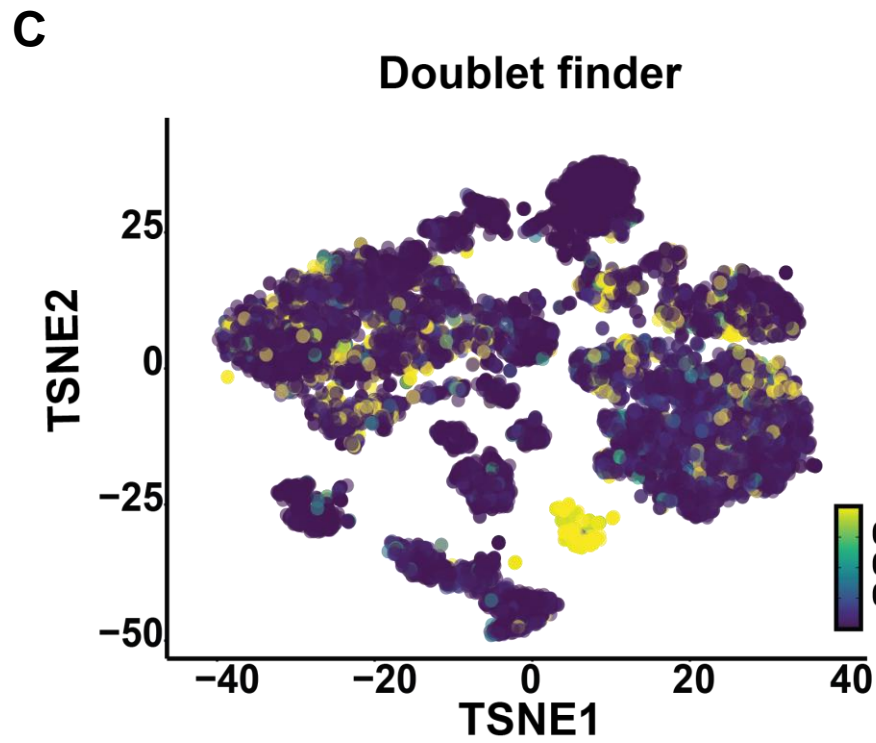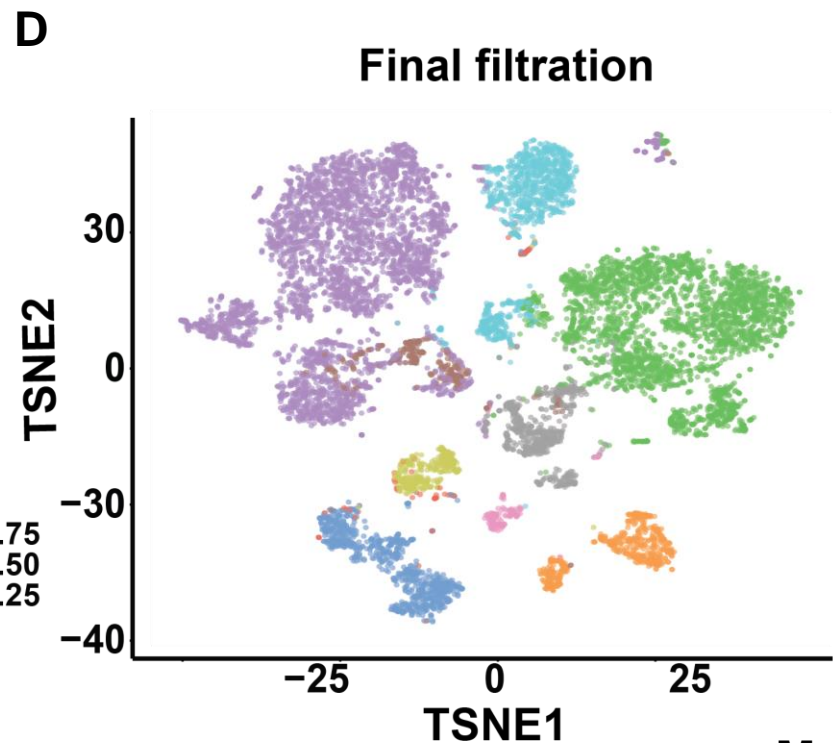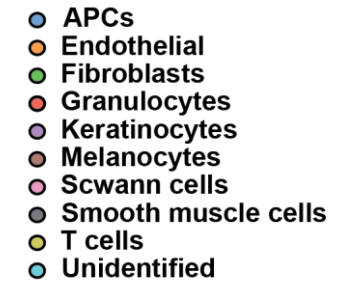

**A**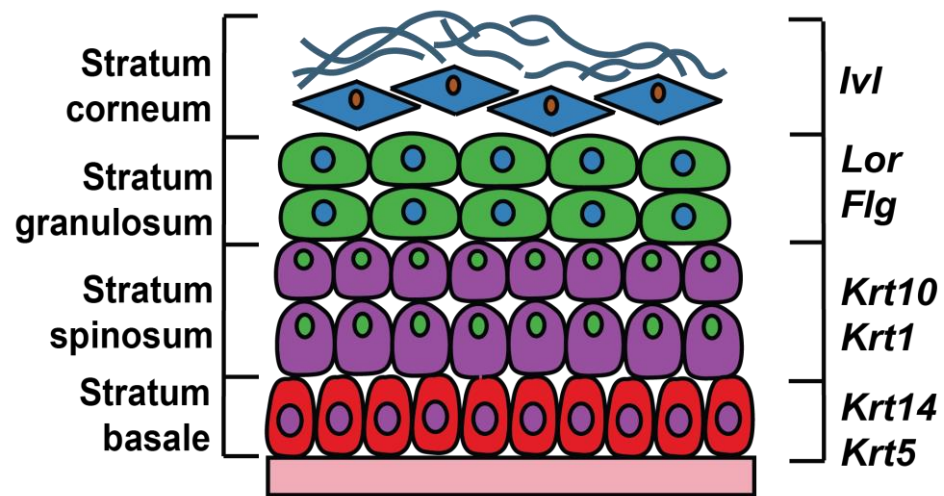**B**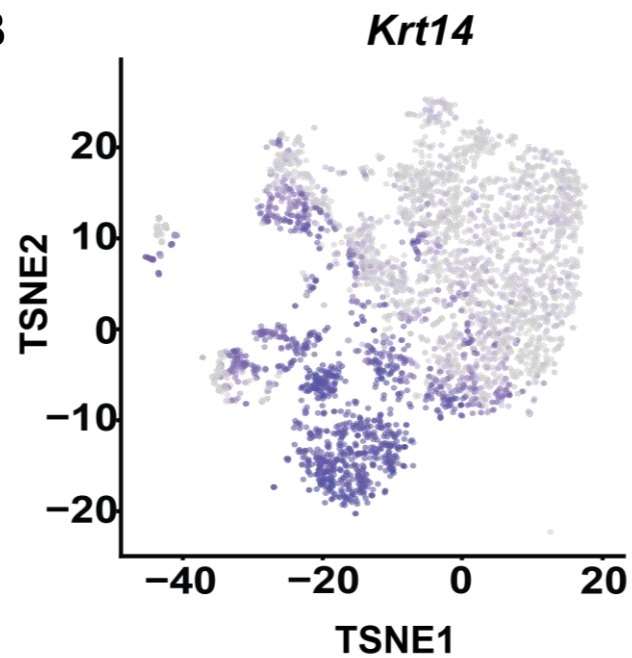**C**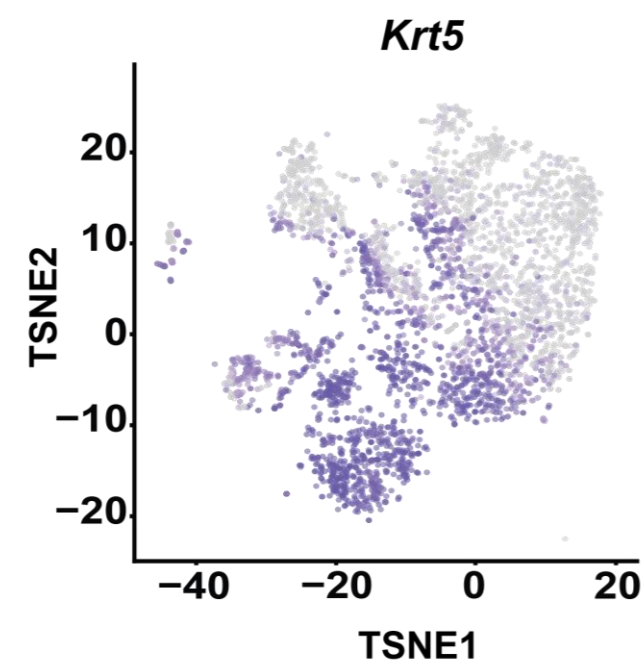**D**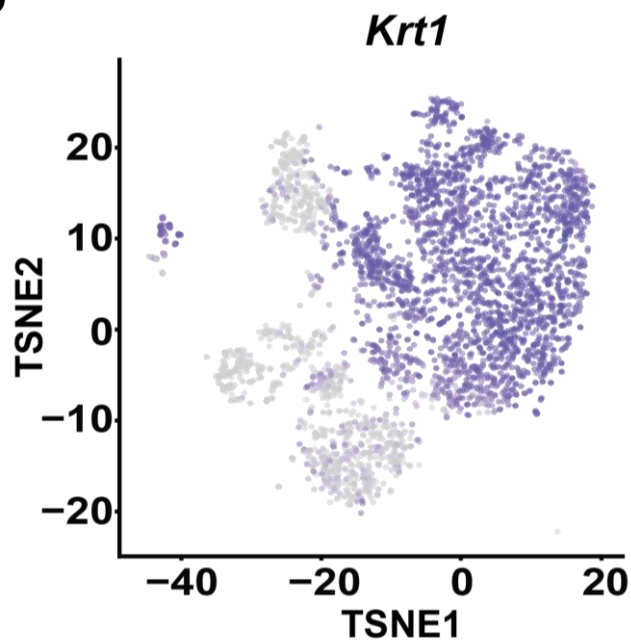**E**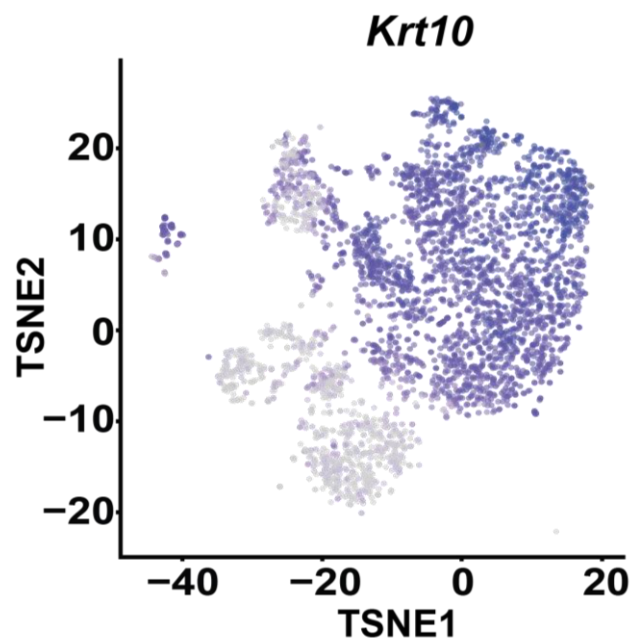**F**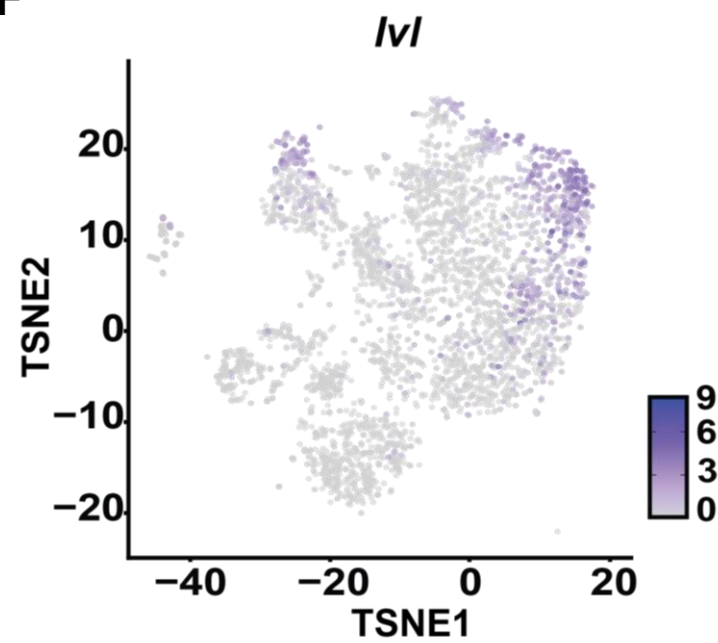



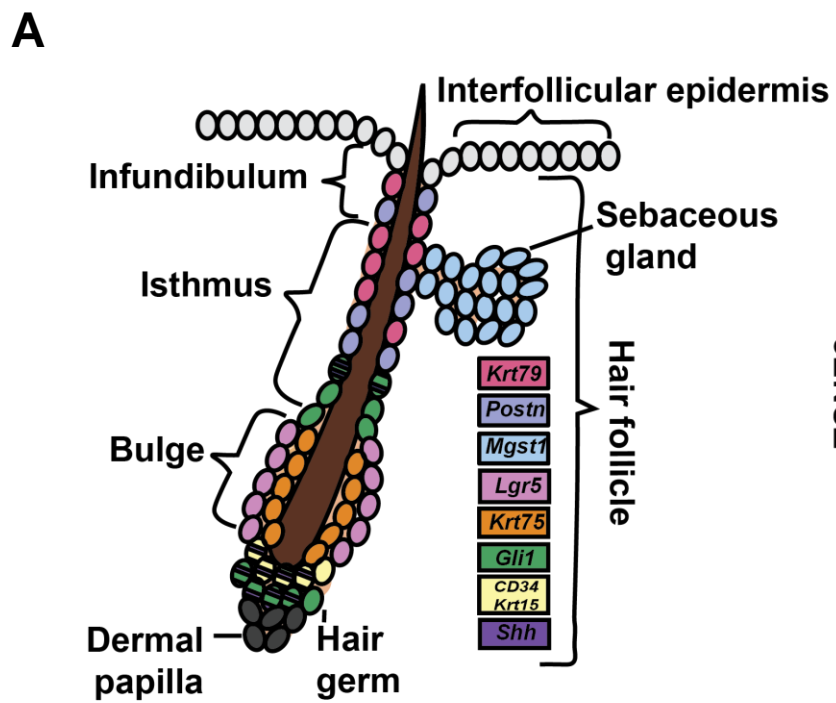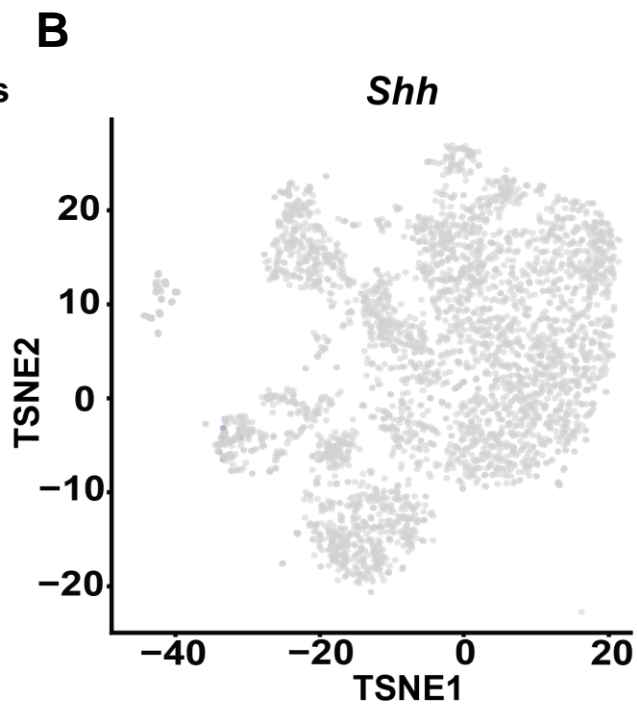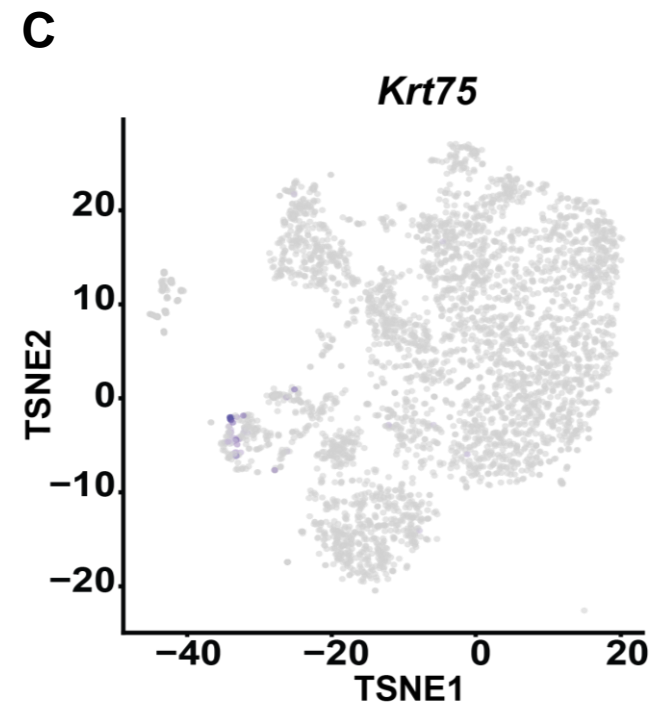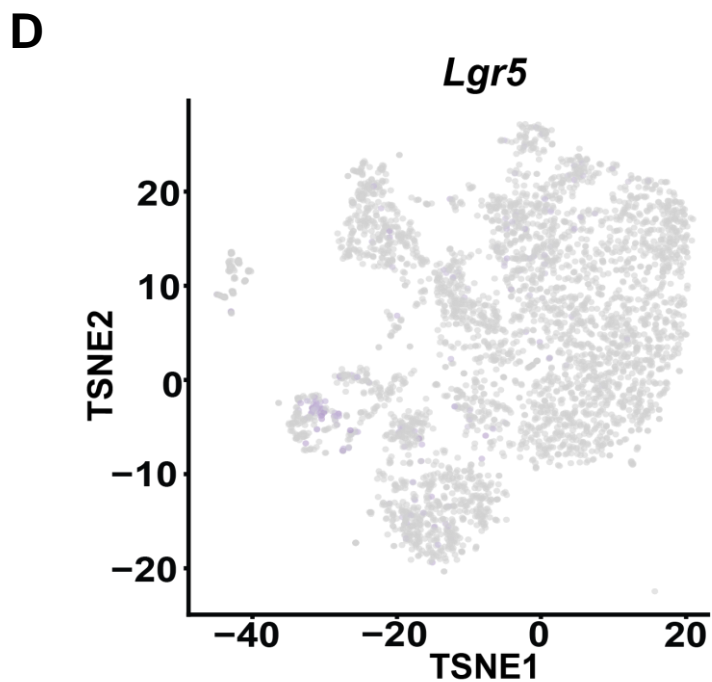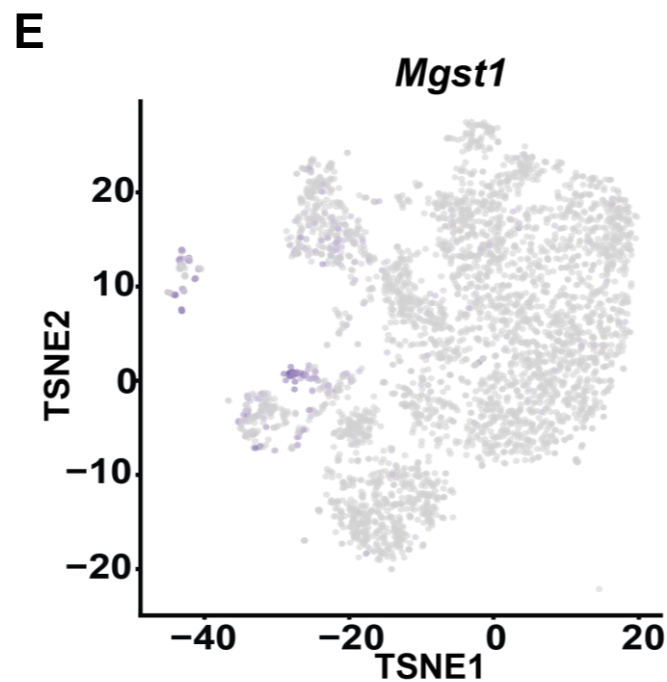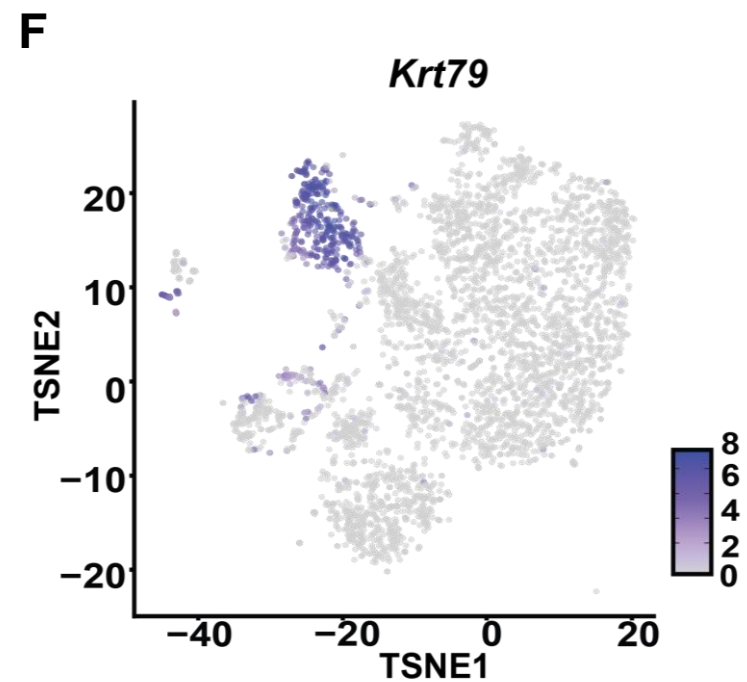

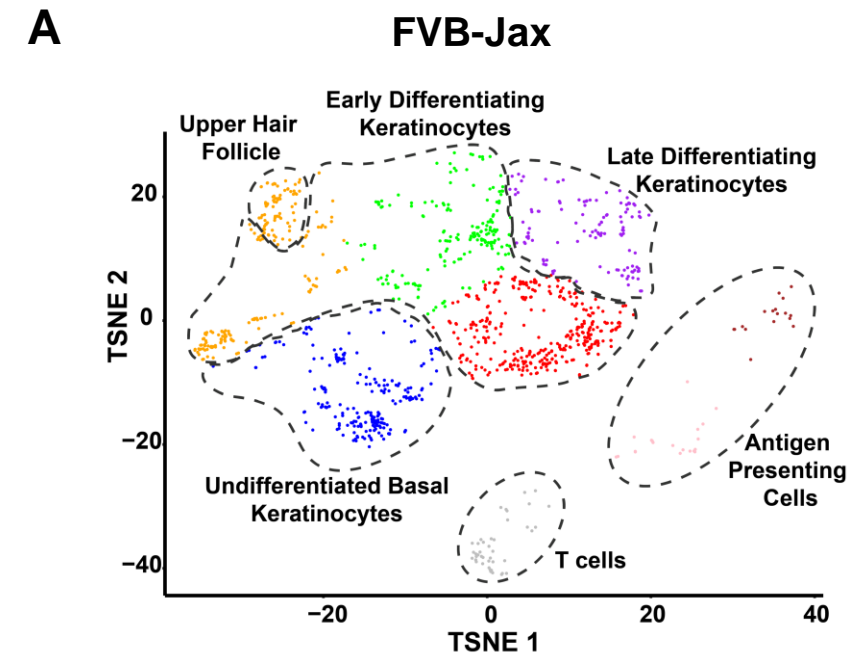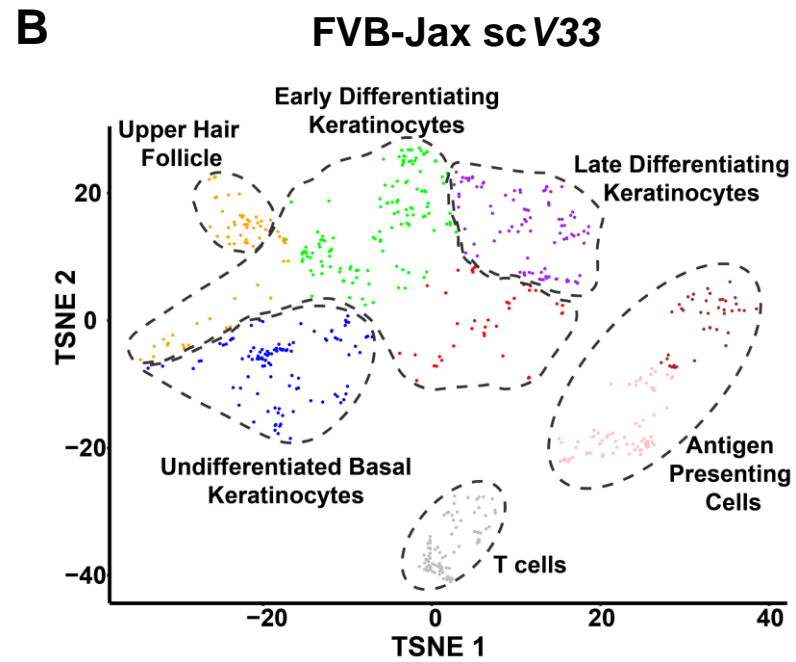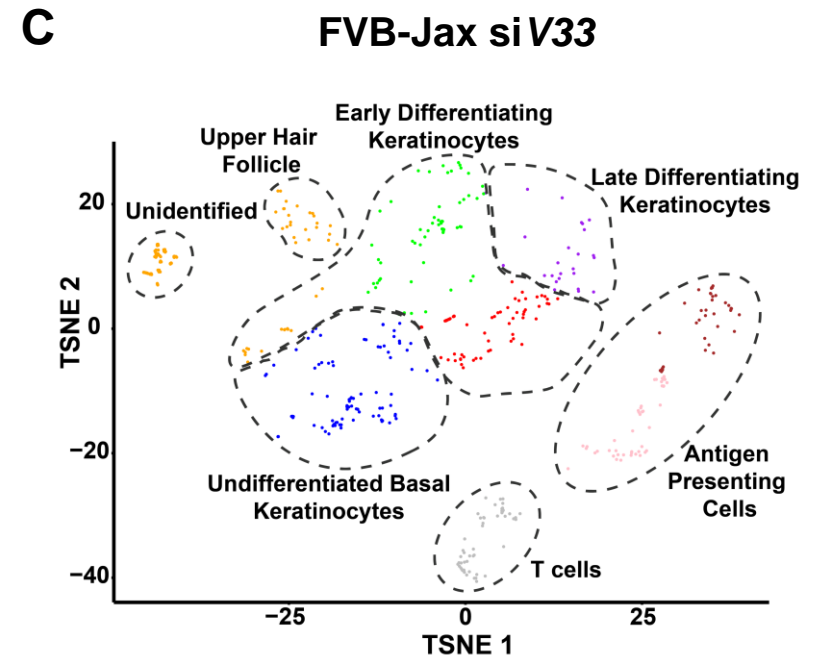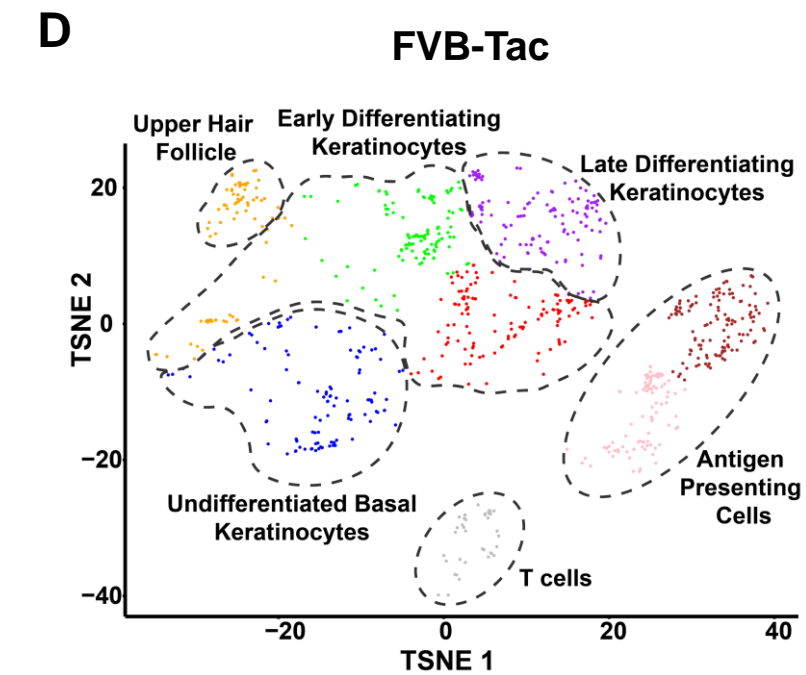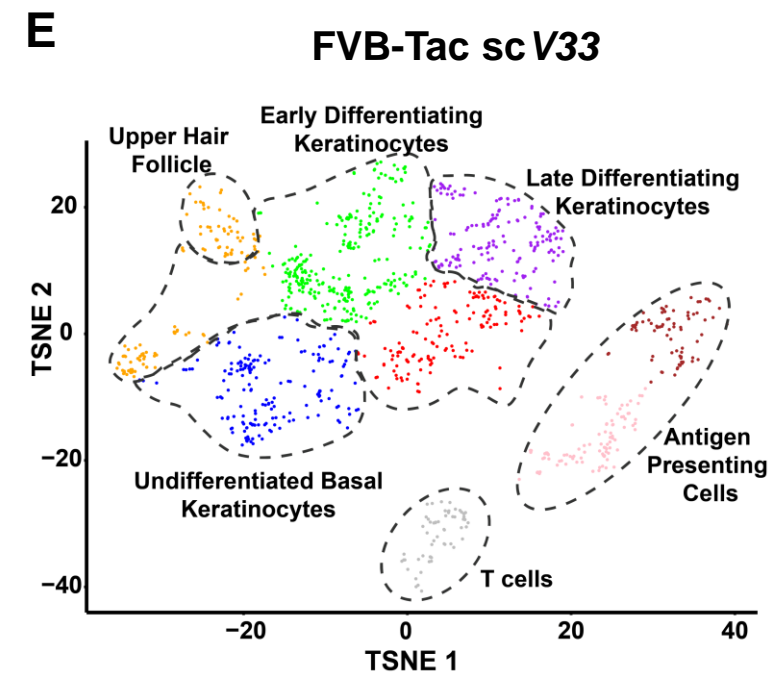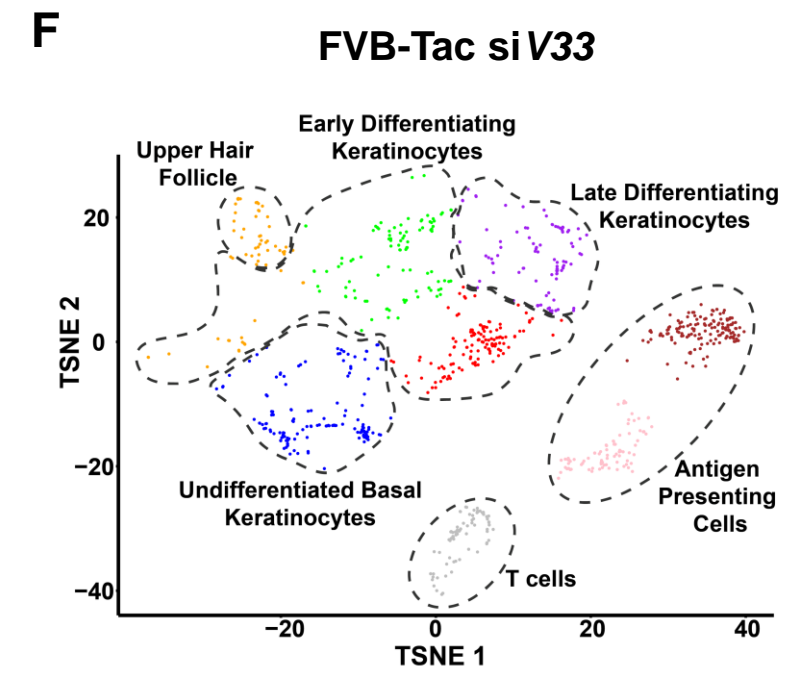

A

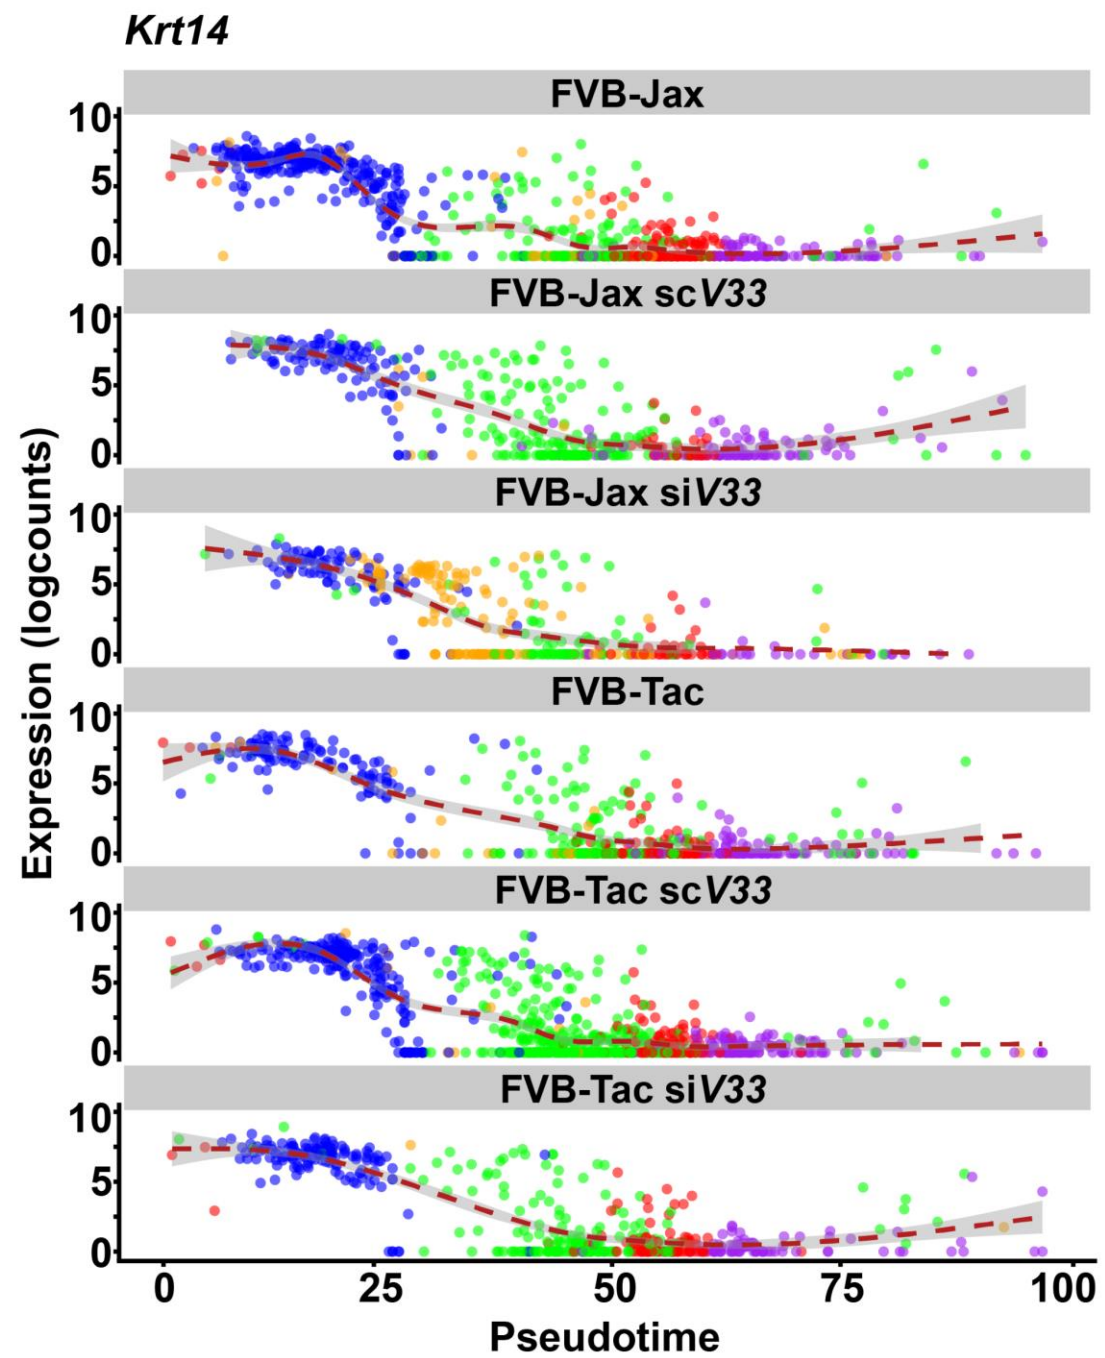

B

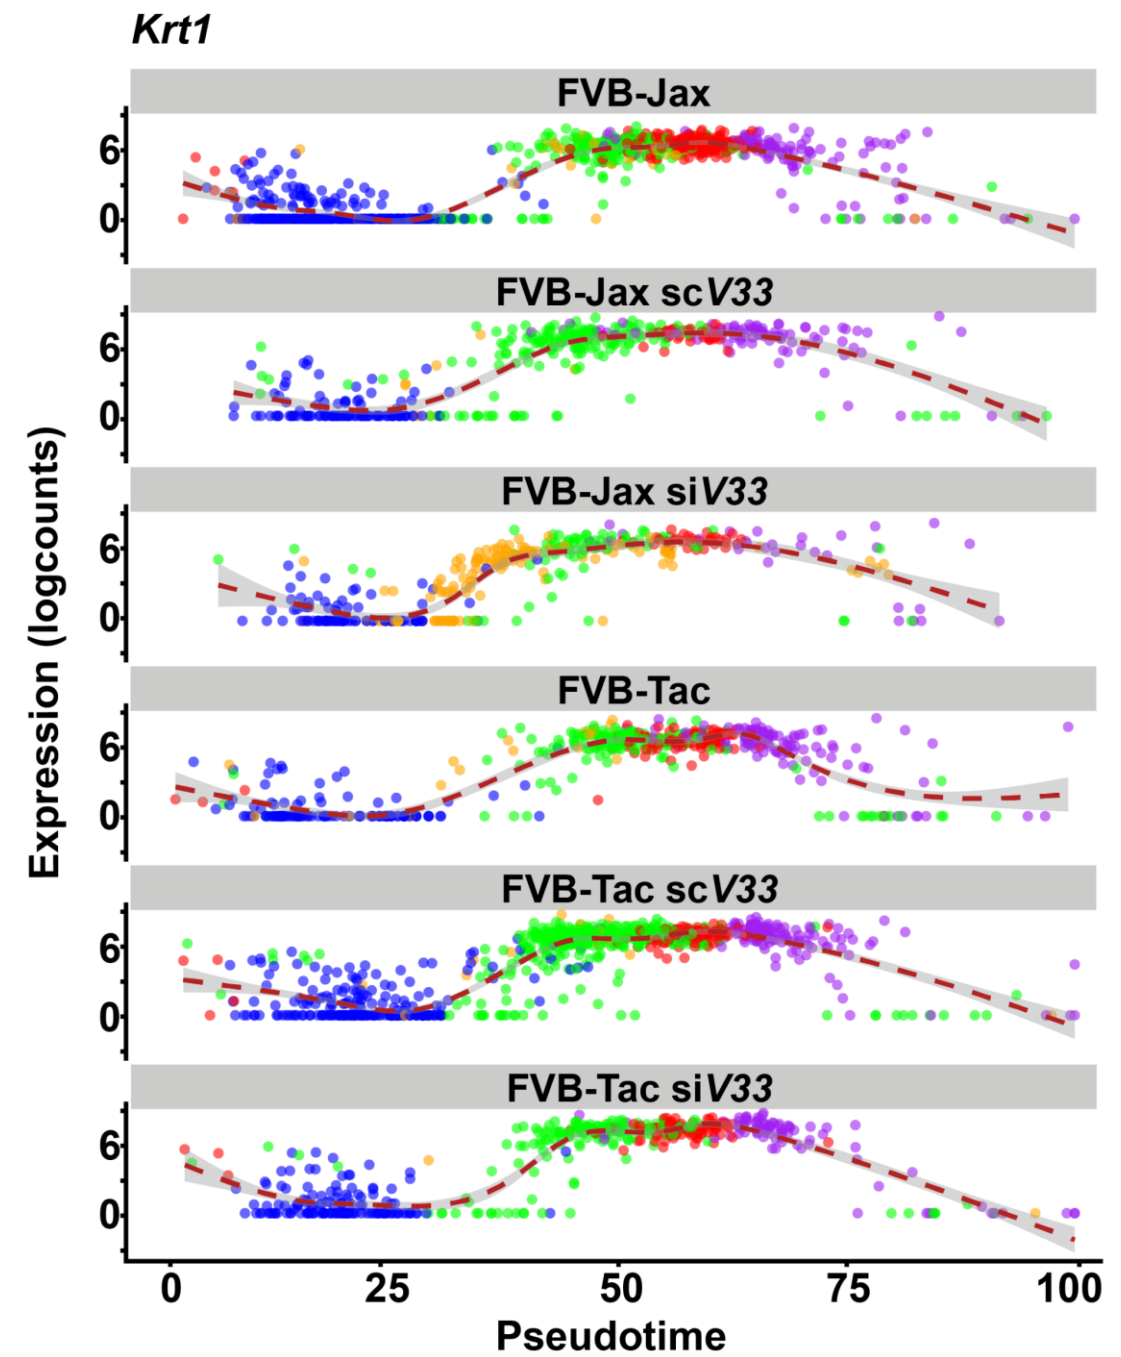

**C**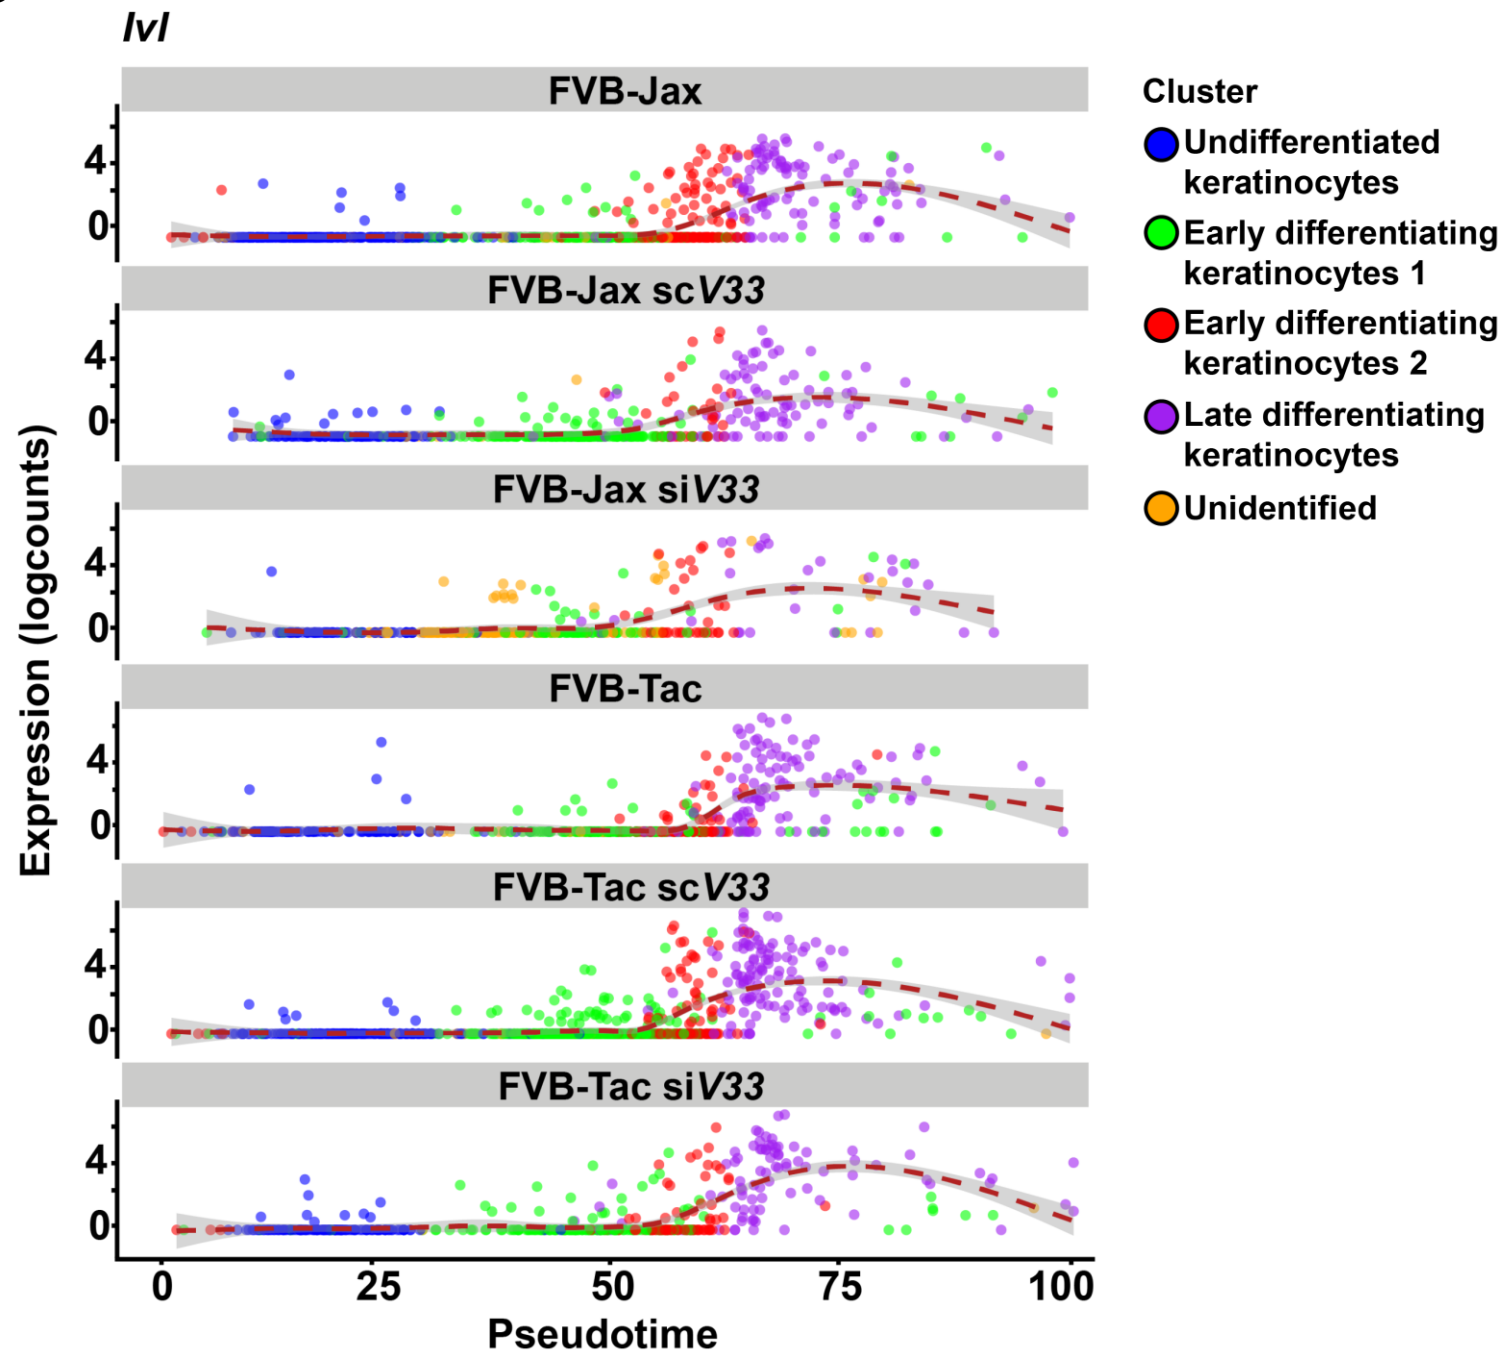

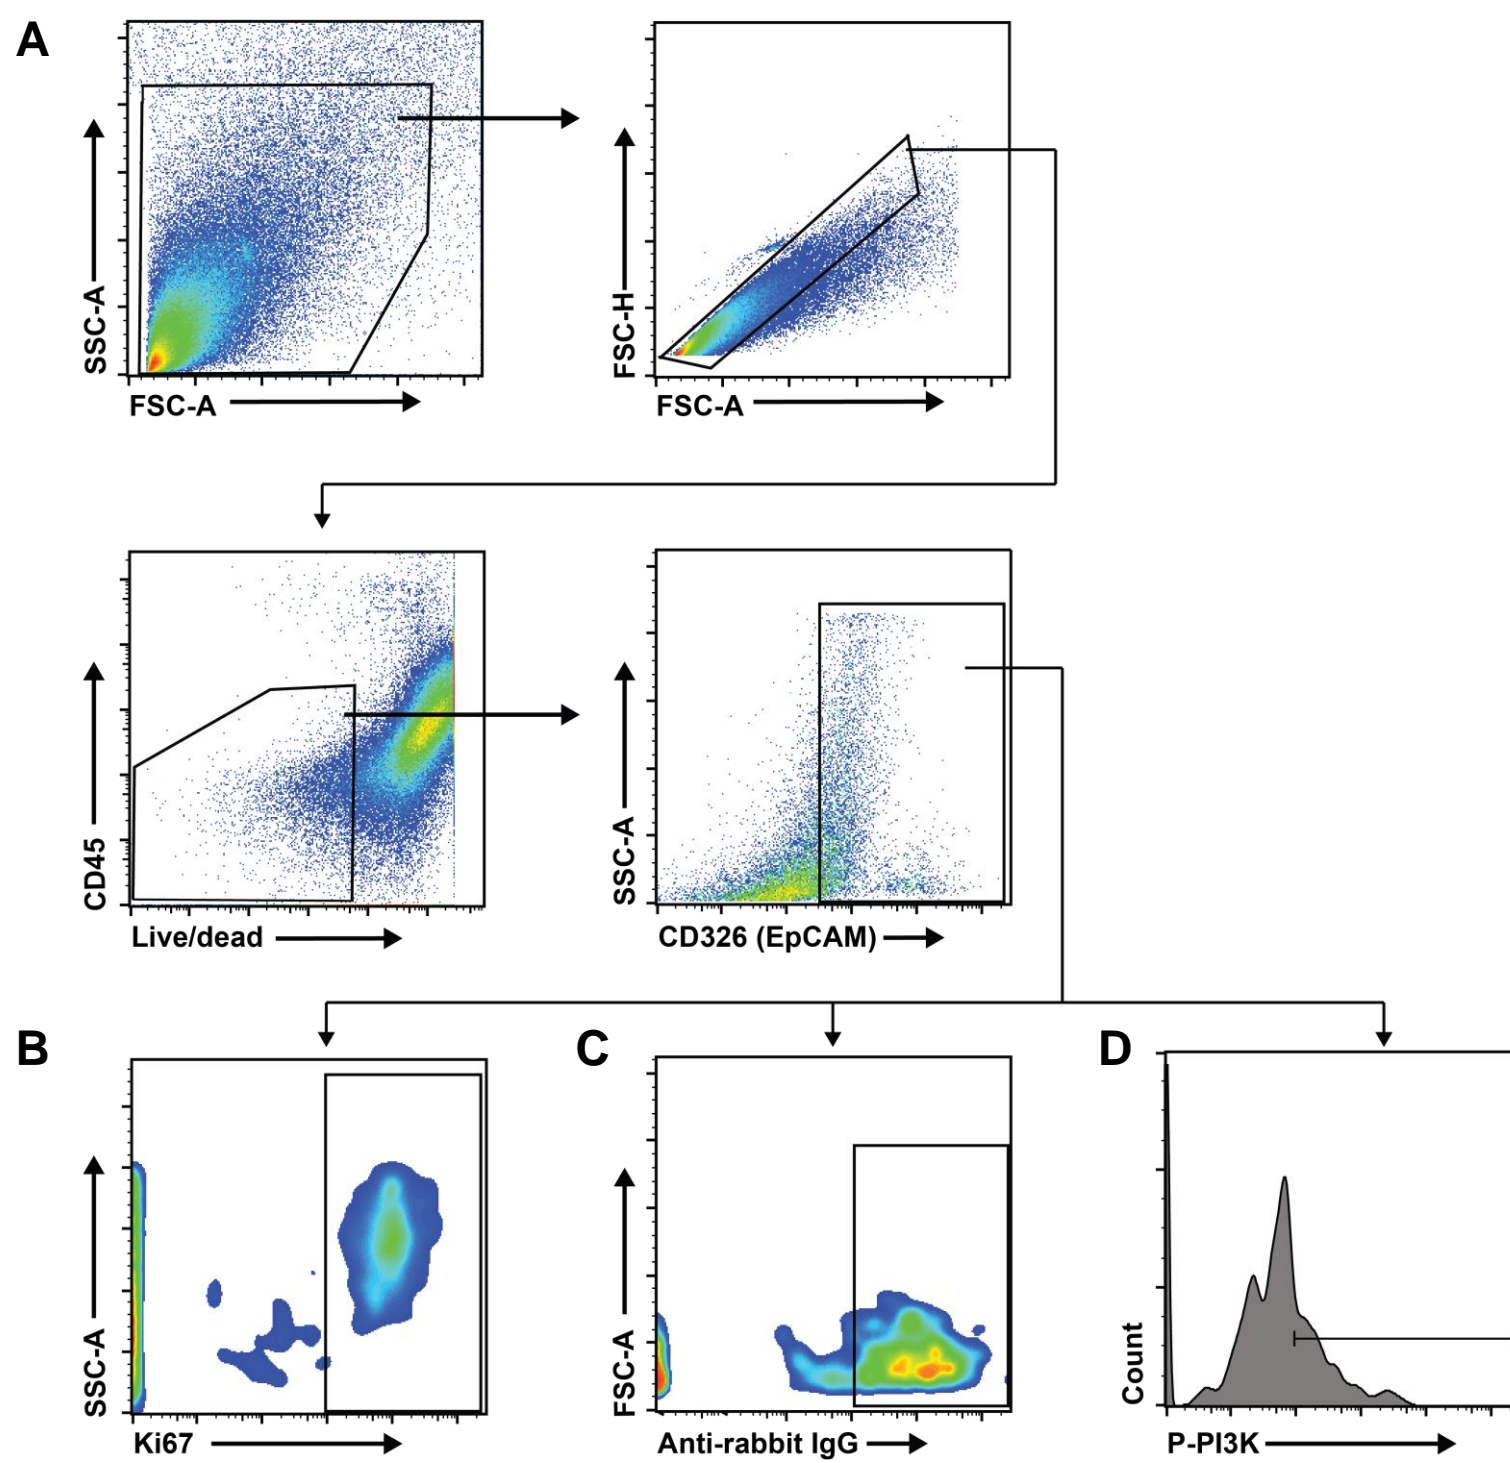

Supplement: media-1.pdf [file media-1.pdf]
